# Supplementary material
Source: PubMed Central journal article supplement (PMC6467317)
Supplement: rccm.201807-1374OC_raju_data_supplement.pdf [file rccm.201807-1374OC_raju_data_supplement.pdf]

## **Rural Residence and Poverty are Independent Risk Factors for COPD in the United States**

Sarath Raju, Corinne A. Keet, Laura M. Paulin, Elizabeth C. Matsui, Roger D. Peng, Nadia N. Hansel, and Meredith C. McCormack

Online Data Supplement

**TABLE E1. Full model of Individual and Community Level Predictors of COPD with Household Poverty Categorized**

|                                          | Crude Model |                  |                  | Adjusted Model* |                  |                  |
|------------------------------------------|-------------|------------------|------------------|-----------------|------------------|------------------|
|                                          | Odds Ratio  | 95% CI           | P-Value          | Odds Ratio      | 95% CI           | P-Value          |
| <u>Census Tract Characteristics</u>      |             |                  |                  |                 |                  |                  |
| <b>Urban-Rural Status</b>                |             |                  |                  |                 |                  |                  |
| Urban                                    |             |                  |                  | Reference       |                  |                  |
| Suburban                                 | 1.04        | 0.93-1.16        | 0.51             | 0.97            | 0.87-1.07        | 0.51             |
| Medium Metro                             | <b>1.30</b> | <b>1.17-1.44</b> | <b>&lt;0.001</b> | 1.03            | 0.93-1.15        | 0.53             |
| Small Metro                              | <b>1.48</b> | <b>1.28-1.44</b> | <b>&lt;0.001</b> | 1.08            | 0.93-1.24        | 0.31             |
| Rural                                    | <b>2.01</b> | <b>1.80-2.23</b> | <b>&lt;0.001</b> | <b>1.26</b>     | <b>1.11-1.43</b> | <b>&lt;0.001</b> |
| <b>Census Level Poverty</b>              |             |                  |                  |                 |                  |                  |
| Community Poverty                        | <b>1.46</b> | <b>1.35-1.57</b> | <b>&lt;0.001</b> | <b>1.12</b>     | <b>1.03-1.23</b> | <b>0.009</b>     |
| <b>Regions</b>                           |             |                  |                  |                 |                  |                  |
| Northeast                                |             |                  |                  | Reference       |                  |                  |
| Midwest                                  | <b>1.35</b> | <b>1.21-1.50</b> | <b>&lt;0.001</b> | <b>1.22</b>     | <b>1.09-1.38</b> | <b>0.001</b>     |
| South                                    | <b>1.32</b> | <b>1.19-1.47</b> | <b>&lt;0.001</b> | <b>1.28</b>     | <b>1.15-1.42</b> | <b>&lt;0.001</b> |
| West                                     | <b>0.87</b> | <b>0.78-0.98</b> | <b>0.023</b>     | 1.01            | 0.90-1.14        | 0.87             |
| <b>Census Tract Fuel Use<sup>†</sup></b> |             |                  |                  |                 |                  |                  |
| Wood                                     | <b>1.01</b> | <b>1.01-1.02</b> | <b>&lt;0.001</b> | 1.00            | 0.99-1.00        | 0.23             |
| Coal                                     | <b>1.07</b> | <b>1.04-1.11</b> | <b>&lt;0.001</b> | 1.03            | 0.98-1.08        | 0.28             |
| <b>Occupation Category<sup>‡</sup></b>   |             |                  |                  |                 |                  |                  |
| Agriculture, Mining                      | <b>1.02</b> | <b>1.01-1.03</b> | <b>0.002</b>     | 1.00            | 1.00-1.01        | 0.64             |
| Construction                             | <b>1.02</b> | <b>1.01-1.03</b> | <b>0.001</b>     | 1.00            | 0.99-1.01        | 0.94             |
| Manufacturing                            | <b>1.02</b> | <b>1.01-1.02</b> | <b>&lt;0.001</b> | 1.00            | 1.00-1.01        | 0.131            |
| <u>Individual Characteristics</u>        |             |                  |                  |                 |                  |                  |
| <b>Demographics</b>                      |             |                  |                  |                 |                  |                  |
| Age (per 10 year increase)               | <b>1.32</b> | <b>1.29-1.35</b> | <b>&lt;0.001</b> | <b>1.04</b>     | <b>1.00-1.07</b> | <b>0.039</b>     |
| Smoking duration                         | <b>1.04</b> | <b>1.04-1.05</b> | <b>&lt;0.001</b> | <b>1.04</b>     | <b>1.03-1.04</b> | <b>&lt;0.001</b> |
| <b>Race</b>                              |             |                  |                  |                 |                  |                  |
| White                                    |             |                  |                  | Reference       |                  |                  |
| Black                                    | <b>0.87</b> | <b>0.79-0.95</b> | <b>0.002</b>     | <b>0.69</b>     | <b>0.62-0.77</b> | <b>&lt;0.001</b> |
| Asian                                    | <b>0.29</b> | <b>0.24-0.36</b> | <b>&lt;0.001</b> | <b>0.44</b>     | <b>0.36-0.55</b> | <b>&lt;0.001</b> |
| Hispanic                                 | <b>0.47</b> | <b>0.42-0.53</b> | <b>0.017</b>     | <b>0.50</b>     | <b>0.44-0.58</b> | <b>&lt;0.001</b> |
| <b>Insurance Status</b>                  |             |                  |                  |                 |                  |                  |
| Private Insurance                        |             |                  |                  | Reference       |                  |                  |
| No Insurance                             | <b>1.62</b> | <b>1.42-1.84</b> | <b>&lt;0.001</b> | 1.10            | 0.95-1.28        | 0.189            |
| Medicare                                 | <b>3.14</b> | <b>2.89-3.41</b> | <b>&lt;0.001</b> | <b>1.89</b>     | <b>1.70-2.10</b> | <b>&lt;0.001</b> |
| Medicaid                                 | <b>5.06</b> | <b>4.59-5.58</b> | <b>&lt;0.001</b> | <b>2.76</b>     | <b>2.44-3.14</b> | <b>&lt;0.001</b> |
| <b>Education</b>                         |             |                  |                  |                 |                  |                  |
| College and Beyond                       |             |                  |                  | Reference       |                  |                  |
| High School Graduate                     | <b>1.62</b> | <b>1.49-1.75</b> | <b>&lt;0.001</b> | 1.09            | 1.00-1.19        | 0.061            |
| Less Than High School                    | <b>2.13</b> | <b>1.96-2.31</b> | <b>&lt;0.001</b> | <b>1.20</b>     | <b>1.08-1.32</b> | <b>0.001</b>     |
| <b>Home Ownership Status</b>             |             |                  |                  |                 |                  |                  |
| Owns Home                                |             |                  |                  | Reference       |                  |                  |
| Other Arrangement (Rented)               | <b>1.54</b> | <b>1.43-1.65</b> | <b>&lt;0.001</b> | <b>1.20</b>     | <b>1.11-1.30</b> | <b>&lt;0.001</b> |
| <b>Household Poverty<sup>§</sup></b>     |             |                  |                  |                 |                  |                  |
| >2.00                                    |             |                  |                  | Reference       |                  |                  |
| <2.00 and ≥1.00                          | <b>2.10</b> | <b>1.95-2.27</b> | <b>&lt;0.001</b> | <b>1.32</b>     | <b>1.21-1.47</b> | <b>&lt;0.001</b> |
| <1.00                                    | <b>2.63</b> | <b>2.44-2.84</b> | <b>&lt;0.001</b> | <b>1.41</b>     | <b>1.27-1.57</b> | <b>&lt;0.001</b> |

\*Adjusted for urban-rural status, community wealth, region, census level occupational distribution, census level fuel use, race, age, sex, smoking duration, household poverty, home ownership, education, and insurance type

†Per 1% increase in census tract residents using this fuel type as their primary source of heating

‡Per 1% increase in census tract residents employed in this occupation

§ Household Income to Poverty Ratio

**Table E2. Sensitivity Analysis For Different Definitions of COPD\***

|                           | Original Definition     |                  | Excluding Asthma <sup>†</sup> |              | Excluding Chronic Bronchitis <sup>‡</sup> |                  |
|---------------------------|-------------------------|------------------|-------------------------------|--------------|-------------------------------------------|------------------|
|                           | Odds Ratio (95% CI)     | P-Value          | Odds Ratio (95% CI)           | P-Value      | Odds Ratio (95% CI)                       | P-Value          |
| <b>Urban-Rural Status</b> |                         |                  |                               |              |                                           |                  |
| Urban                     |                         |                  | Reference                     |              |                                           |                  |
| Suburban                  | 0.97 (0.87-1.07)        | 0.51             | 0.90 (0.79-1.02)              | 0.088        | 1.03 (0.90-1.18)                          | 0.68             |
| Medium Metro              | 1.02 (0.92-1.14)        | 0.69             | 0.96 (0.85-1.09)              | 0.56         | 1.07 (0.94-1.23)                          | 0.31             |
| Small Metro               | 1.05 (0.91-1.21)        | 0.49             | 0.97 (0.82-1.14)              | 0.67         | 1.16 (0.97-1.39)                          | 0.102            |
| Rural                     | <b>1.23 (1.09-1.40)</b> | <b>&lt;0.001</b> | <b>1.16 (1.01-1.33)</b>       | <b>0.035</b> | <b>1.34 (1.14-1.58)</b>                   | <b>&lt;0.001</b> |

\*Adjusted for urban-rural status, community and household wealth, region, census level occupational distribution, fuel use, race, age, sex, smoking duration, home ownership, education, and insurance type

<sup>†</sup>Adjusts original definition of COPD to not include individuals with a current diagnosis of asthma

<sup>‡</sup>Excludes individuals who only have a diagnosis of chronic bronchitis from having COPD
